# Supplementary material for: Intra-ovarian injection of bone marrow-derived c-Kit+ cells for ovarian rejuvenation in menopausal rats
Source: PubMed Central journal article supplement — Bioimpacts. 2021 Sep 25;12(4):325–35. doi: 10.34172/bi.2021.23499 (PMC9376162; doi:10.34172/bi.2021.23499), 2021-09-25
Supplement: bi-12-325-s001.pdf [file bi-12-325-s001.pdf]

# Intra-ovarian injection of bone marrow-derived c-Kit<sup>+</sup> cells for ovarian rejuvenation in menopausal rats

Sepideh Sheshpari<sup>1\*</sup>, Mahnaz Shahnazi<sup>1</sup>, Shahin Ahmadian<sup>2\*</sup>, Mohammad Nouri<sup>3,4</sup>, Mehran Mesgari Abbasi<sup>5</sup>, Rahim Beheshti<sup>6</sup>, Reza Rahbarghazi<sup>3,7</sup>, Ali Honaramooz<sup>8</sup>, Mahdi Mahdipour<sup>3,4\*</sup>

<sup>1</sup> Department of Midwifery, Faculty of Nursing and Midwifery, Tabriz University of Medical Sciences, Tabriz, Iran

<sup>2</sup> Department of Biology, Faculty of Science, Azerbaijan Shahid Madani University, Tabriz, Iran

<sup>3</sup> Stem Cell Research Center, Tabriz University of Medical Sciences, Tabriz, Iran

<sup>4</sup> Department of Reproductive Biology, Faculty of Advanced Medical Sciences, Tabriz University of Medical Sciences, Tabriz, Iran

<sup>5</sup> Drug Applied Research Center, Tabriz University of Medical Sciences, Tabriz, Iran

<sup>6</sup> Department of Veterinary Science, Islamic Azad University, Shabestar Branch, Shabestar, Iran

<sup>7</sup> Department of Applied Cell Sciences, Faculty of Advanced Medical Sciences, Tabriz University of Medical Sciences, Tabriz, Iran

<sup>8</sup> Department of Veterinary Biomedical Sciences, Western College of Veterinary Medicine, University of Saskatchewan, Saskatoon, SK, S7N 5B4, Canada

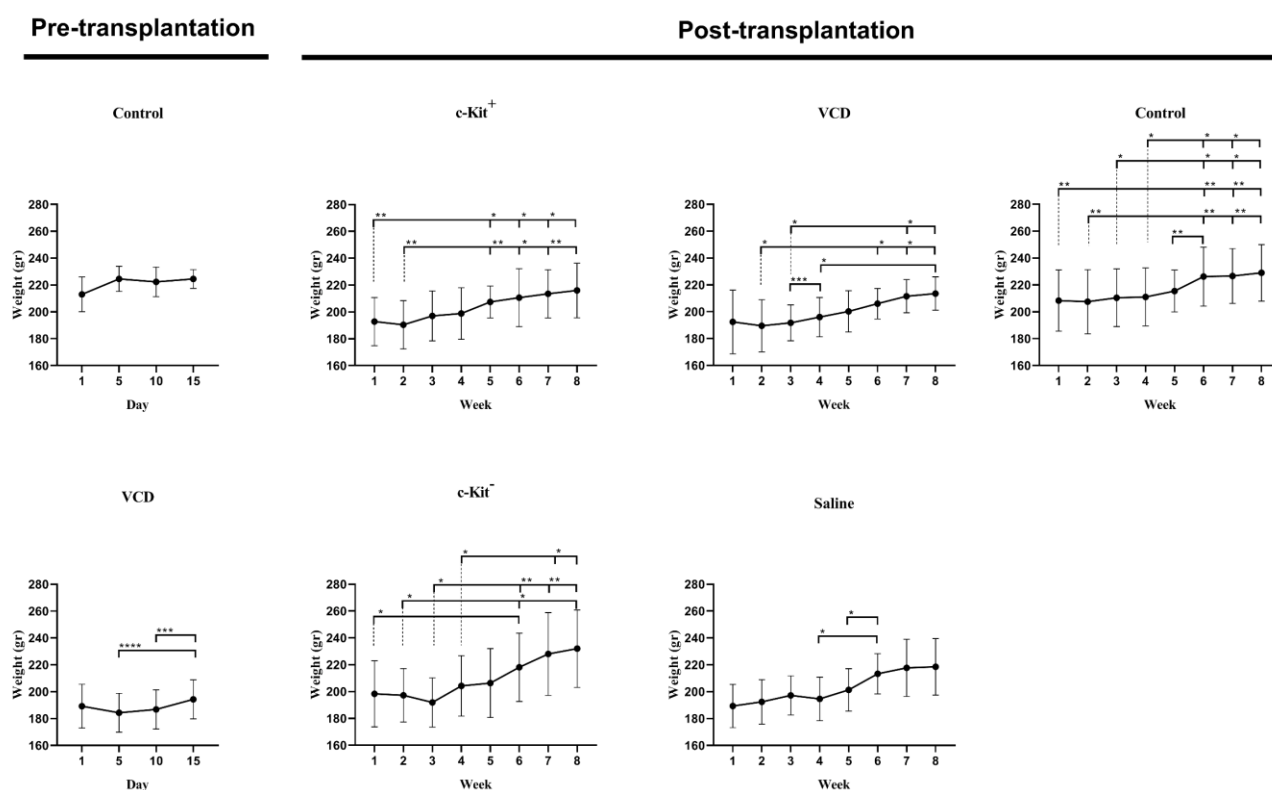

**Fig. S1.** Body weight of rat's pre-transplantation (every 5 days) and post-transplantation (weekly) in different groups.
